# Supplementary material
Source: PubMed Central journal article supplement (PMC1782012)
Supplement: bmj_334_7586_201__1.pdf [file bmj_334_7586_201__1.pdf]

References [As supplied by authors]

- w1. Arbab AS, Nishiyama Y, Aoki S, Yoshikawa T, Kumagai H, Araki T *et al*. Simultaneous display of MRA and MPR in detecting vascular compression for trigeminal neuralgia or hemifacial spasm: comparison with oblique sagittal views of MRI. *Eur Radiol*. 2000;10:1056-60.
- w2. Devor M, Amir R, Rappaport ZH. Pathophysiology of trigeminal neuralgia: the ignition hypothesis. *Clin.J Pain* 2002;18:4-13.
- w3. Devor M, Govrin-Lippmann R, Rappaport ZH. Mechanism of trigeminal neuralgia: an ultrastructural analysis of trigeminal root specimens obtained during microvascular decompression surgery. *J Neurosurg* 2002;96:532-43.
- w4. Hilton DA, Love S, Gradidge T, Coakham HB. Pathological findings associated with trigeminal neuralgia caused by vascular compression. *Neurosurgery* 1994;35:299-303.
- w5. Pareja JA, Cuadrado ML, Caminero AB, Barriga FJ, Baron M, Sanchez-del-Rio M. Duration of attacks of first division trigeminal neuralgia. *Cephalalgia* 2005;25:305-8.
- w6. Anderson VC, Berryhill PC, Sandquist MA, Ciaverella DP, Nesbit GM, Burchiel KJ. High-resolution three-dimensional magnetic resonance angiography and three-dimensional spoiled gradient-recalled imaging in the evaluation of neurovascular compression in patients with trigeminal neuralgia: a double-blind pilot study. *Neurosurgery* 2006;58:666-73.
- w7. Fromm GH, Terrence CF, Chattha AS. Baclofen in the treatment of trigeminal neuralgia: double-blind study and long-term follow-up. *Ann.Neurol* 1984;15:240-4.
- w8. Zakrzewska JM, Chaudhry Z, Nurmikko TJ, Patton DW, Mullens EL. Lamotrigine (lamictal) in refractory trigeminal neuralgia: results from a double-blind placebo controlled crossover trial. *Pain* 1997;73:223-30.
- w9. Lechin F, van der DB, Lechin ME, Amat J, Lechin AE, Cabrera A *et al*. Pimozide therapy for trigeminal neuralgia. *Arch Neurol* 1989;46:960-3.
- w10. Broggi G, Ferroli P, Franzini A, Galosi L. The role of surgery in the treatment of typical and atypical facial pain. *Neurol Sci* 2005;26 Suppl 2:s95-100.
- w11. Abdennebi B, Bouatta F, Chitti M, Bougatene B. Percutaneous balloon compression of the Gasserian ganglion in trigeminal neuralgia. Long-term results in 150 cases. *Acta Neurochir.(Wien.)* 1995;136:72-4.
- w12. Youlikis AS, Sagher O. Treatment of Occipital Neuralgia and Related Posterior Headache Syndromes. In Follett KA, ed. *Neurosurgical Pain Management*, pp 102-9. Iowa City: Elsevier Saunders, 2004.
- w13. Pollock BE, Phuong LK, Gorman DA, Foote RL, Stafford SL. Stereotactic radiosurgery for idiopathic trigeminal neuralgia. *J Neurosurg* 2002;97:347-53.
- w14. Richards GM, Bradley KA, Tome WA, Bentzen SM, Resnick DK, Mehta MP. Linear accelerator radiosurgery for trigeminal neuralgia. *Neurosurgery* 2005;57:1193-200.

- w15. Barker FG, Jannetta PJ, Bissonette DJ, Larkins MV, Jho HD. The long-term outcome of microvascular decompression for trigeminal neuralgia. *N.Engl.J Med* 1996;334:1077-83.
- w16. Bederson JB, Wilson CB. Evaluation of microvascular decompression and partial sensory rhizotomy in 252 cases of trigeminal neuralgia. *J Neurosurg* 1989;71:359-67.
- w17. Broggi G, Ferroli P, Franzini A, Servello D, Dones I. Microvascular decompression for trigeminal neuralgia: comments on a series of 250 cases, including 10 patients with multiple sclerosis. *J Neurol Neurosurg Psychiatry* 2000;68:59-64.
- w18. Olson S, Atkinson L, Weidmann M. Microvascular decompression for trigeminal neuralgia: recurrences and complications. *J Clin.Neurosci* 2005;12:787-9.
- w19. Maesawa S, Salame C, Flickinger JC, Pirris S, Kondziolka D, Lunsford LD. Clinical outcomes after stereotactic radiosurgery for idiopathic trigeminal neuralgia. *J Neurosurg* 2001;94:14-20.
- w20. North RB, Kidd DH, Piantadosi S, Carson BS. Percutaneous retrogasserian glycerol rhizotomy. Predictors of success and failure in treatment of trigeminal neuralgia. *J Neurosurg* 1990;72:851-6.
- w21. Pollock BE. Percutaneous retrogasserian glycerol rhizotomy for patients with idiopathic trigeminal neuralgia: a prospective analysis of factors related to pain relief. *J Neurosurg* 2005;102:223-8.
- w22. Slettebo H, Hirschberg H, Lindegaard KF. Long-term results after percutaneous retrogasserian glycerol rhizotomy in patients with trigeminal neuralgia. *Acta Neurochir.(Wien.)* 1993;122:231-5.
- w23. Latchaw JP, Jr., Hardy RW, Jr., Forsythe SB, Cook AF. Trigeminal neuralgia treated by radiofrequency coagulation. *J Neurosurg* 1983;59:479-84.
- w24. Kanpolat Y, Savas A, Bekar A, Berk C. Percutaneous controlled radiofrequency trigeminal rhizotomy for the treatment of idiopathic trigeminal neuralgia: 25-year experience with 1,600 patients. *Neurosurgery* 2001;48:524-32.
- w25. Oturai AB, Jensen K, Eriksen J, Madsen F. Neurosurgery for trigeminal neuralgia: comparison of alcohol block, neurectomy, and radiofrequency coagulation. *Clin.J Pain* 1996;12:311-5.
